# Supplementary material for: T cell receptor β repertoires in patients with COVID-19 reveal disease severity signatures
Source: PubMed Central journal article supplement (PMC10355153; doi:10.3389/fimmu.2023.1190844), 2023-07-05

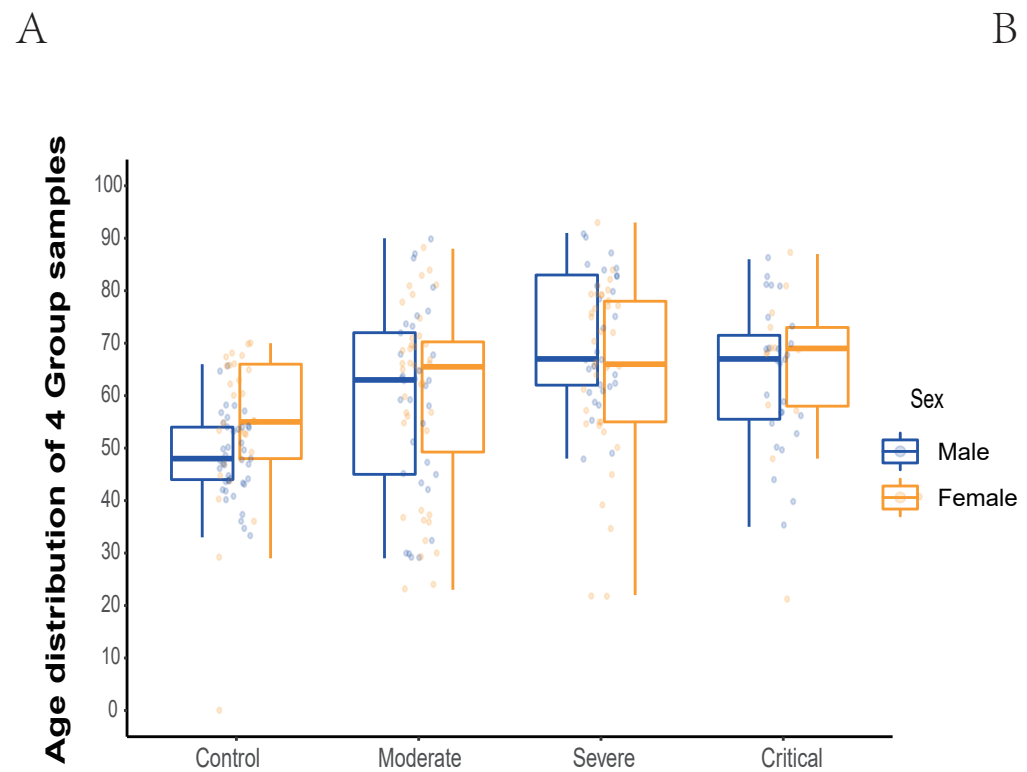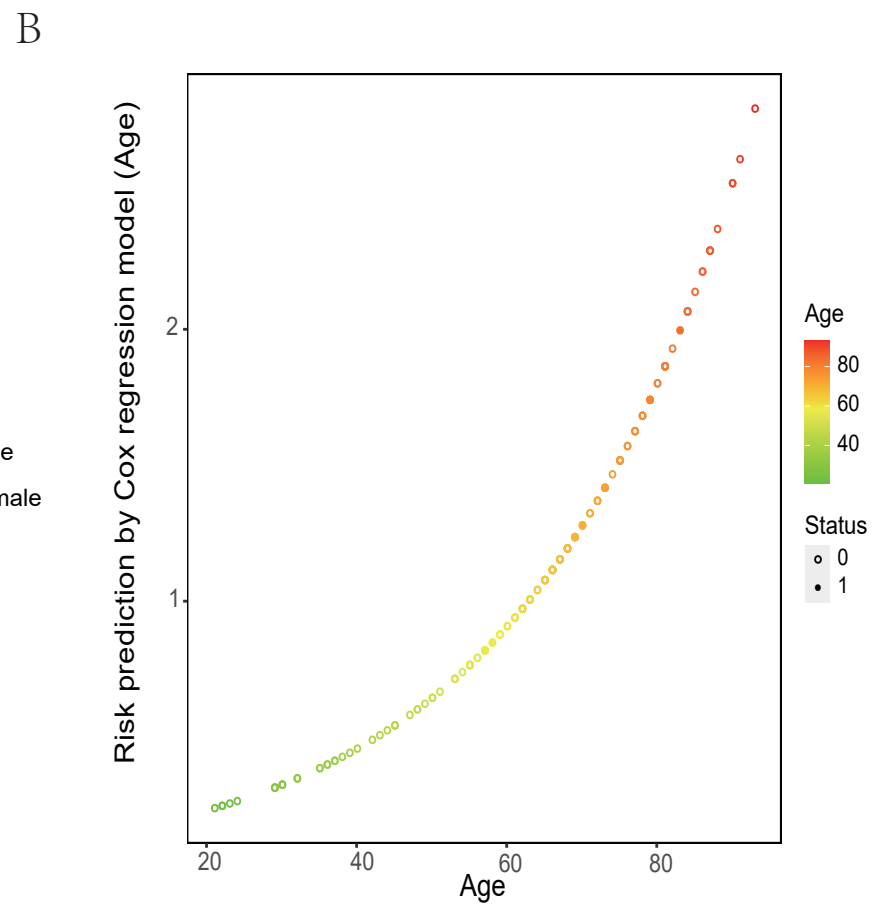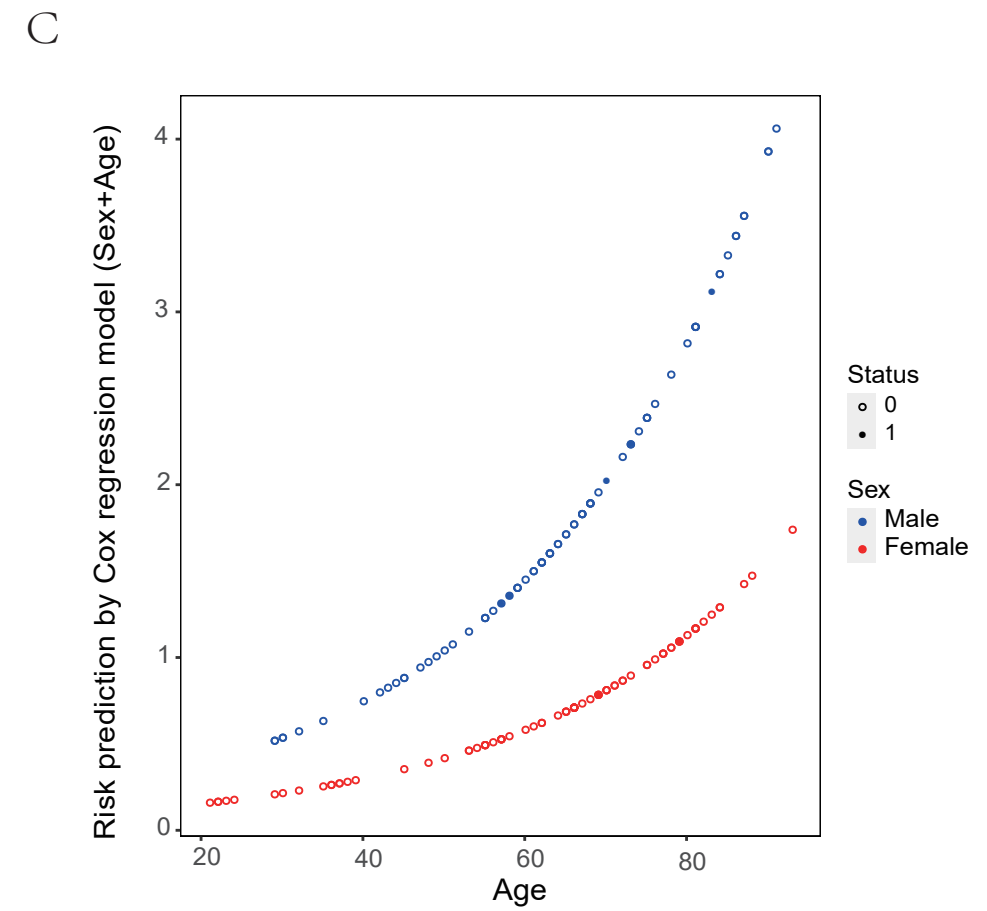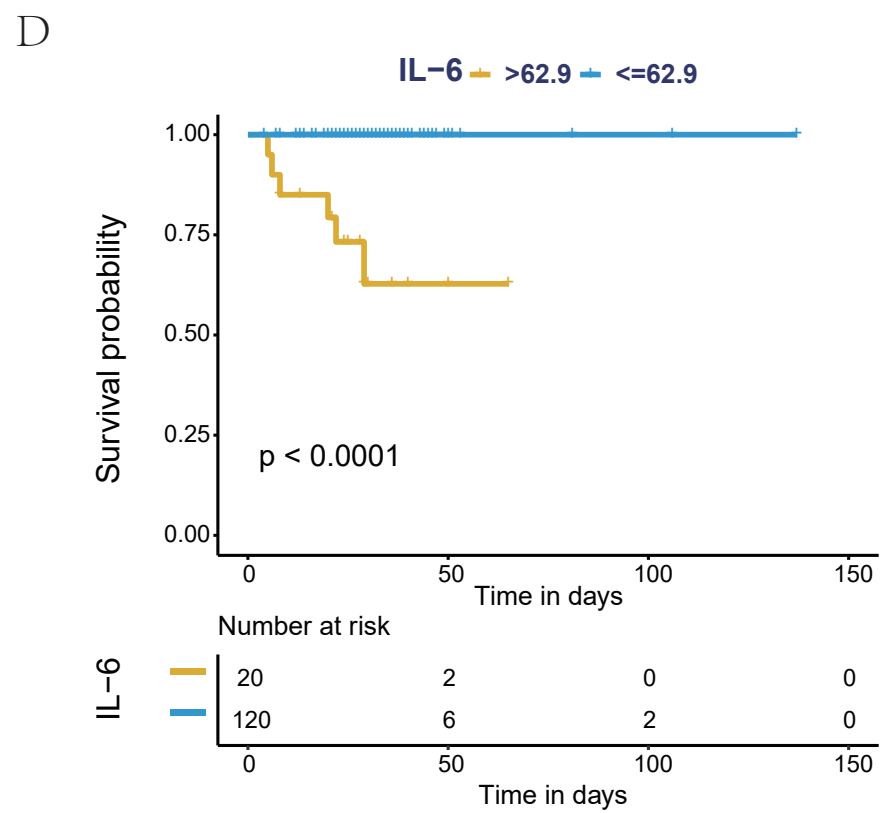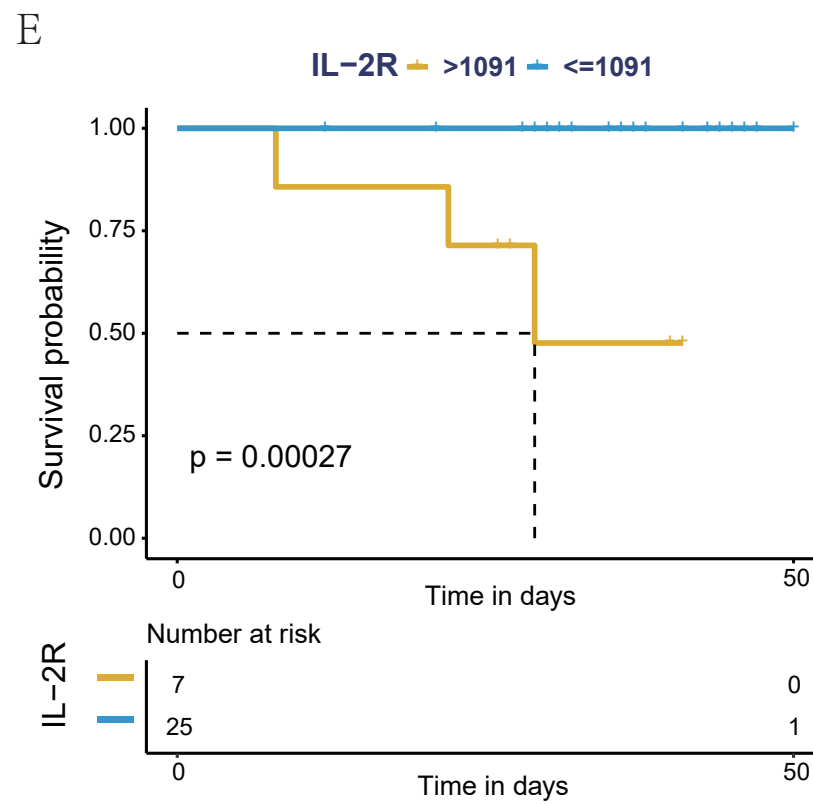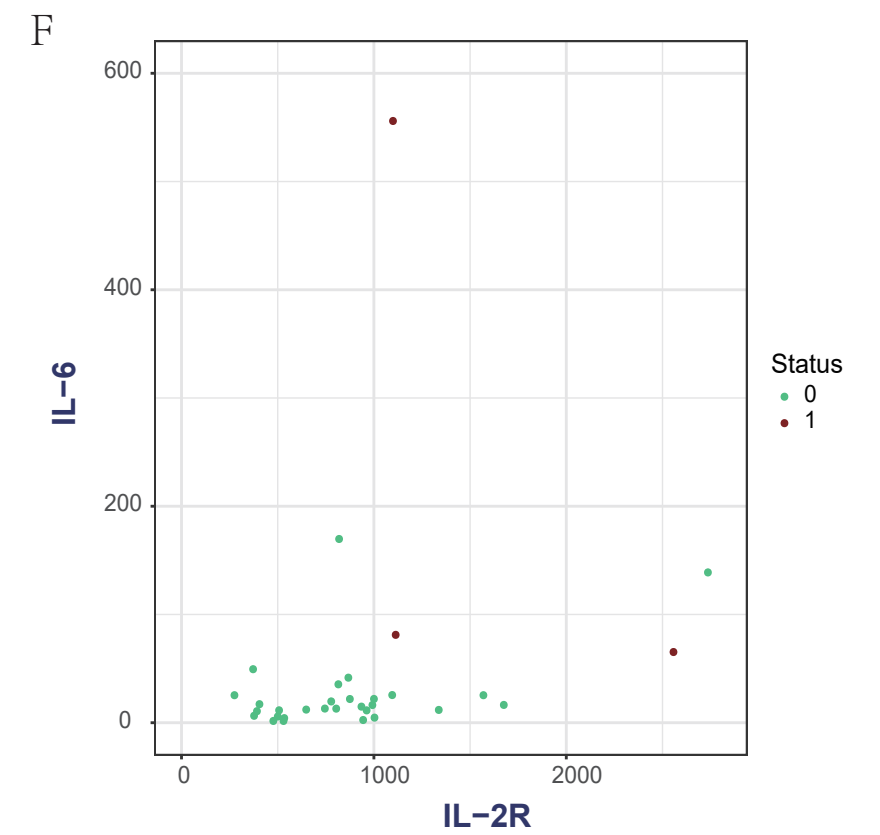

Supplement: Image_1.pdf [file Image_1.pdf]
